# Supplementary material for: Communication Disparities between Nursing Home Team Members
Source: MDPI journal article supplement (doi:10.3390/ijerph19105975), 2022-05-14
Supplement: s1 [file s1]

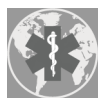

*Supplemental Content*

## Long-Term Care Communication Survey Question 1

This anonymous survey asks for your responses to questions about communication in long-term care facilities. The questions address both your communication with providers and staff in long-term care teams as well as your communication with residents and their families. The survey results will help design educational offerings to improve communication in long-term care facilities. We thank you in advance for your time and effort in completing this survey. The survey should take no more than about 10 min.

1. When I communicate my concerns about the resident to those listed below, my input is:

|                                    | Not Valued | Somewhat Valued | Mostly Valued | Highly Valued | Not Applicable |
|------------------------------------|------------|-----------------|---------------|---------------|----------------|
| Activities Director                | 1          | 2               | 3             | 4             | NA             |
| Administrators                     | 1          | 2               | 3             | 4             | NA             |
| Certified Nursing Assistants       | 1          | 2               | 3             | 4             | NA             |
| Dietary                            | 1          | 2               | 3             | 4             | NA             |
| Director of Nursing                | 1          | 2               | 3             | 4             | NA             |
| Front Desk / Office                | 1          | 2               | 3             | 4             | NA             |
| Housekeeping/Laundry               | 1          | 2               | 3             | 4             | NA             |
| Human Resources                    | 1          | 2               | 3             | 4             | NA             |
| Licensed Nursing / MDS Coordinator | 1          | 2               | 3             | 4             | NA             |
| Maintenance                        | 1          | 2               | 3             | 4             | NA             |
| Medical Technicians                | 1          | 2               | 3             | 4             | NA             |
| Nurses                             | 1          | 2               | 3             | 4             | NA             |
| Occupational Therapy               | 1          | 2               | 3             | 4             | NA             |
| Other members of my discipline     | 1          | 2               | 3             | 4             | NA             |
| Pharmacists                        | 1          | 2               | 3             | 4             | NA             |
| Physical Therapy                   | 1          | 2               | 3             | 4             | NA             |
| Physicians                         | 1          | 2               | 3             | 4             | NA             |
| Social Workers                     | 1          | 2               | 3             | 4             | NA             |
| Speech Therapy                     | 1          | 2               | 3             | 4             | NA             |
| Other: (Please Specify)            | 1          | 2               | 3             | 4             | NA             |
